# Supplementary material for: Identifying the critical factors of transmission efficiency loss in China’s natural gas network
Source: Frontiers journal article supplement (doi:10.3389/fenrg.2022.1029077), 2023-01-24
Supplement: Data_Sheet_1.docx [file Data_Sheet_1.docx]

# Appendix 1: Distribution of the backbone natural gas pipeline network in China


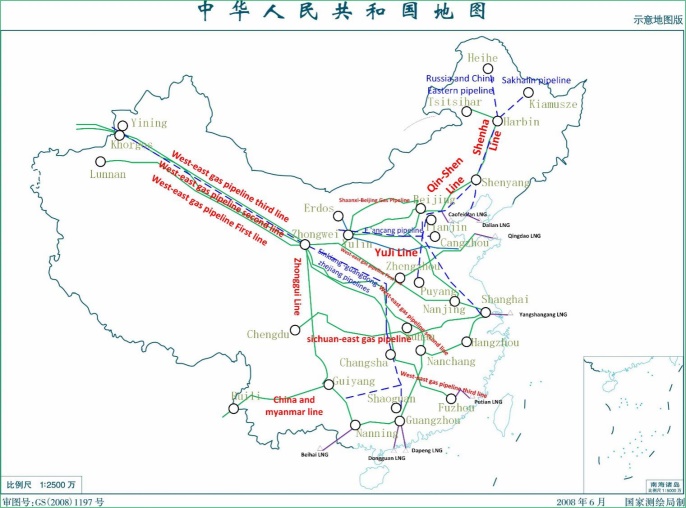


# Appendix 2. Natural Gas Supply deployment in China


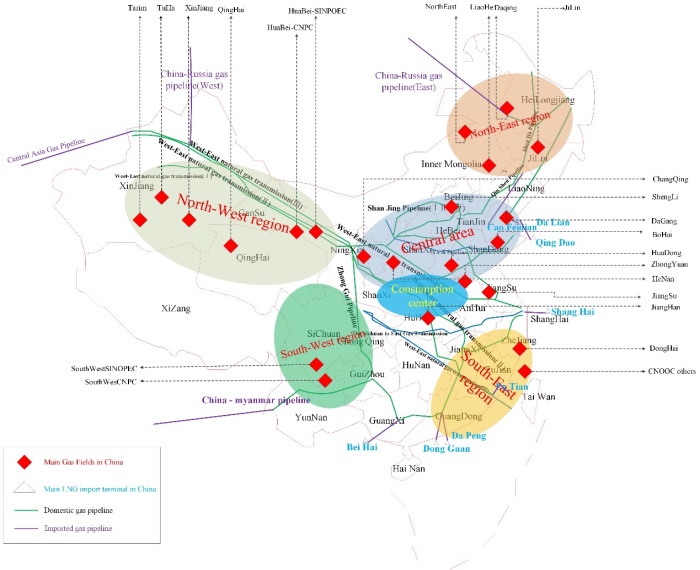


# Appendix 3: Generalized sketch of China's natural gas network
